# Supplementary material for: Behavioural reactions of three-spined sticklebacks to simulated risk of predation—Effects of predator distance and movement
Source: Atypon-hosted journal article supplement (doi:10.1139/facets-2015-0015), 2016-06-10
Supplement: facets-2015-0015_supplement1.pdf [file facets-2015-0015_supplement1.pdf]

SUPPLEMENTARY MATERIAL TO:

**Behavioural reactions of three-spined sticklebacks to simulated risk of predation  
- effects of predator distance and movement**

Joacim Näslund, Leo Pettersson, & Jörgen I. Johnsson

**TABLES OF PAIRWISE CONTRASTS**

**INSTRUCTIONS ON HOW TO READ THE CONTRAST-TABLES**

Tables show p-values from pairwise contrast estimates. These contrasts relates to figure 3 in the main article

Pairwise contrasts among time-intervals within treatments  
(treatment noted in black box in the upper left corner)

|           | T1                      | T2 | T3 | T4 | T5 | T6                        | T7 | T8 |
|-----------|-------------------------|----|----|----|----|---------------------------|----|----|
| <b>T1</b> |                         |    |    |    |    |                           |    |    |
| <b>T2</b> | Mobile<br>vs.<br>Mobile |    |    |    |    | Immobile<br>vs.<br>Mobile |    |    |
| <b>T3</b> |                         |    |    |    |    |                           |    |    |
| <b>T4</b> |                         |    |    |    |    |                           |    |    |
| <b>T5</b> |                         |    |    |    |    |                           |    |    |
| <b>T6</b> |                         |    |    |    |    | Immobile                  |    |    |
| <b>T7</b> |                         |    |    |    |    | vs.                       |    |    |
| <b>T8</b> |                         |    |    |    |    | Immobile                  |    |    |

Pairwise contrasts among treatments,  
within time intervals (time interval noted  
in black box in the upper left corner)

|             | N                                   | D47 | D88 | D129 | D170 |
|-------------|-------------------------------------|-----|-----|------|------|
| <b>N</b>    | No predator vs. Predator            |     |     |      |      |
| <b>D47</b>  | Predators at<br>different distances |     |     |      |      |
| <b>D88</b>  |                                     |     |     |      |      |
| <b>D129</b> |                                     |     |     |      |      |
| <b>D170</b> |                                     |     |     |      |      |

|                                         |
|-----------------------------------------|
| <b>Colour codes:</b>                    |
| Pairwise contrast with $p < 0.05$       |
| Pairwise contrast with $0.1 > p > 0.05$ |
| *** = " $p < 0.001$ "                   |

**T1-T8:** Time intervals (T1 = first minute; T2 = second minute; etc.)

|                                                                                                                 |
|-----------------------------------------------------------------------------------------------------------------|
| <b>Key to treatments:</b>                                                                                       |
| <b>N:</b> No predator                                                                                           |
| <b>D47:</b> Predator model at 47 cm distance during T1-T5; then moved to 6 cm and kept moving* during T6-T8     |
| <b>D88:</b> Predator model at 88 cm distance during T1-T5; then moved to 47 cm and kept moving* during T6-T8    |
| <b>D129:</b> Predator model at 129 cm distance during T1-T5; then moved to 88 cm and kept moving* during T6-T8  |
| <b>D170:</b> Predator model at 170 cm distance during T1-T5; then moved to 129 cm and kept moving* during T6-T8 |
| * Movement = head lifted every 10 seconds                                                                       |

PROPORTION OF TIME FREEZING

Table S1a-m. Showing p-values of pairwise contrasts for the analysis of freezing time (see Fig. 3a)

| S1a. |    |       |       |       |       |       |       |       | S1f. |   |       |       |       |       |
|------|----|-------|-------|-------|-------|-------|-------|-------|------|---|-------|-------|-------|-------|
| N    | T1 | T2    | T3    | T4    | T5    | T6    | T7    | T8    | T1   | N | D47   | D88   | D129  | D170  |
| T1   |    | 0.295 | 0.054 | ***   | ***   |       |       |       | N    |   | 0.528 | 0.166 | 0.789 | 0.475 |
| T2   |    |       | 0.391 | 0.015 | 0.004 |       |       |       | D47  |   |       | 0.465 | 0.367 | 0.178 |
| T3   |    |       |       | 0.130 | 0.054 |       |       |       | D88  |   |       |       | 0.094 | 0.032 |
| T4   |    |       |       |       | 0.680 |       |       |       | D129 |   |       |       |       | 0.652 |
| T5   |    |       |       |       |       |       |       |       | D170 |   |       |       |       |       |
| T6   |    |       |       |       |       |       |       |       | S1g. |   |       |       |       |       |
| T7   |    |       |       |       |       |       |       |       | T2   | N | D47   | D88   | D129  | D170  |
| T8   |    |       |       |       |       |       |       |       | N    |   | 0.449 | 0.029 | 0.697 | 0.709 |
| S1b. |    |       |       |       |       |       |       |       | D47  |   |       | 0.182 | 0.713 | 0.254 |
| D47  | T1 | T2    | T3    | T4    | T5    | T6    | T7    | T8    | D88  |   |       |       | 0.081 | 0.008 |
| T1   |    | 0.219 | 0.028 | 0.001 | ***   | 0.788 | 0.334 | 0.471 | D129 |   |       |       |       | 0.442 |
| T2   |    |       | 0.361 | 0.044 | 0.016 | 0.339 | 0.026 | 0.549 | D170 |   |       |       |       |       |
| T3   |    |       |       | 0.271 | 0.128 | 0.057 | 0.001 | 0.108 | S1h. |   |       |       |       |       |
| T4   |    |       |       |       | 0.650 | 0.002 | ***   | 0.004 | T3   | N | D47   | D88   | D129  | D170  |
| T5   |    |       |       |       |       | ***   | ***   | 0.001 | N    |   | 0.422 | 0.013 | 0.274 | 0.870 |
| T6   |    |       |       |       |       |       |       | 0.217 | D47  |   |       | 0.106 | 0.779 | 0.334 |
| T7   |    |       |       |       |       |       |       | 0.074 | D88  |   |       |       | 0.177 | 0.008 |
| T8   |    |       |       |       |       |       |       |       | D129 |   |       |       |       | 0.208 |
| S1c. |    |       |       |       |       |       |       |       | D170 |   |       |       |       |       |
| D88  | T1 | T2    | T3    | T4    | T5    | T6    | T7    | T8    | S1i. |   |       |       |       |       |
| T1   |    | 0.045 | 0.002 | 0.003 | 0.002 | 0.767 | 0.440 | 0.139 | T4   | N | D47   | D88   | D129  | D170  |
| T2   |    |       | 0.220 | 0.267 | 0.247 | 0.020 | 0.004 | 0.505 | N    |   | 0.608 | 0.240 | 0.880 | 0.412 |
| T3   |    |       |       | 0.890 | 0.935 | 0.001 | ***   | 0.051 | D47  |   |       | 0.498 | 0.715 | 0.180 |
| T4   |    |       |       |       | 0.955 | 0.001 | ***   | 0.067 | D88  |   |       |       | 0.299 | 0.046 |
| T5   |    |       |       |       |       | 0.001 | ***   | 0.060 | D129 |   |       |       |       | 0.329 |
| T6   |    |       |       |       |       |       |       | 0.635 | D170 |   |       |       |       |       |
| T7   |    |       |       |       |       |       |       | 0.018 | S1j. |   |       |       |       |       |
| T8   |    |       |       |       |       |       |       |       | T5   | N | D47   | D88   | D129  | D170  |
| S1d. |    |       |       |       |       |       |       |       | N    |   | 0.582 | 0.364 | 0.687 | 0.648 |
| D129 | T1 | T2    | T3    | T4    | T5    | T6    | T7    | T8    | D47  |   |       | 0.711 | 0.880 | 0.928 |
| T1   |    | 0.053 | ***   | ***   | ***   | ***   | ***   | ***   | D88  |   |       |       | 0.603 | 0.650 |
| T2   |    |       | 0.069 | 0.035 | 0.005 | 0.038 | 0.001 | ***   | D129 |   |       |       |       | 0.953 |
| T3   |    |       |       | 0.779 | 0.313 | 0.807 | 0.111 | 0.031 | D170 |   |       |       |       |       |
| T4   |    |       |       |       | 0.461 | 0.972 | 0.179 | 0.051 | S1k. |   |       |       |       |       |
| T5   |    |       |       |       |       | 0.440 | 0.507 | 0.158 | T6   | N | D47   | D88   | D129  | D170  |
| T6   |    |       |       |       |       |       |       | 0.168 | N    |   |       |       |       |       |
| T7   |    |       |       |       |       |       |       | 0.048 | D47  |   |       | 0.762 | 0.050 | 0.163 |
| T8   |    |       |       |       |       |       |       | 0.376 | D88  |   |       |       | 0.106 | 0.282 |
| S1e. |    |       |       |       |       |       |       |       | D129 |   |       |       |       | 0.624 |
| D170 | T1 | T2    | T3    | T4    | T5    | T6    | T7    | T8    | D170 |   |       |       |       |       |
| T1   |    | 0.154 | 0.011 | 0.001 | ***   | ***   | ***   | ***   | S1l. |   |       |       |       |       |
| T2   |    |       | 0.263 | 0.077 | ***   | 0.016 | ***   | ***   | T7   | N | D47   | D88   | D129  | D170  |
| T3   |    |       |       | 0.532 | 0.008 | 0.223 | ***   | 0.002 | N    |   |       |       |       |       |
| T4   |    |       |       |       | 0.047 | 0.559 | 0.004 | 0.013 | D47  |   |       | 0.371 | ***   | ***   |
| T5   |    |       |       |       |       | 0.158 | 0.223 | 0.596 | D88  |   |       |       | 0.001 | ***   |
| T6   |    |       |       |       |       |       |       | 0.020 | D129 |   |       |       |       | 0.516 |
| T7   |    |       |       |       |       |       |       | 0.057 | D170 |   |       |       |       |       |
| T8   |    |       |       |       |       |       |       | 0.359 | S1m. |   |       |       |       |       |
| S1f. |    |       |       |       |       |       |       |       | T8   | N | D47   | D88   | D129  | D170  |
| S1g. |    |       |       |       |       |       |       |       | N    |   |       |       |       |       |
| S1h. |    |       |       |       |       |       |       |       | D47  |   |       | 0.162 | ***   | 0.003 |
| S1i. |    |       |       |       |       |       |       |       | D88  |   |       |       | 0.029 | 0.139 |
| S1j. |    |       |       |       |       |       |       |       | D129 |   |       |       |       | 0.375 |
| S1k. |    |       |       |       |       |       |       |       | D170 |   |       |       |       |       |
| S1l. |    |       |       |       |       |       |       |       |      |   |       |       |       |       |
| S1m. |    |       |       |       |       |       |       |       |      |   |       |       |       |       |

**PROPORTION OF TIME IN FRONTAL ZONE**

**Table S2a-m.** Showing p-values of pairwise contrasts for the analysis of time in frontal zone (see Fig. 3b)

| S2a. |    |       |       |       |       |    |    |    |
|------|----|-------|-------|-------|-------|----|----|----|
| N    | T1 | T2    | T3    | T4    | T5    | T6 | T7 | T8 |
| T1   |    | 0.959 | 0.364 | 0.581 | 0.855 |    |    |    |
| T2   |    |       | 0.337 | 0.616 | 0.895 |    |    |    |
| T3   |    |       |       | 0.144 | 0.274 |    |    |    |
| T4   |    |       |       |       | 0.712 |    |    |    |
| T5   |    |       |       |       |       |    |    |    |
| T6   |    |       |       |       |       |    |    |    |
| T7   |    |       |       |       |       |    |    |    |
| T8   |    |       |       |       |       |    |    |    |

| S2b. |    |       |       |       |       |       |       |       |
|------|----|-------|-------|-------|-------|-------|-------|-------|
| D47  | T1 | T2    | T3    | T4    | T5    | T6    | T7    | T8    |
| T1   |    | 0.233 | 0.955 | 0.910 | 0.563 | 0.303 | 0.078 | 0.113 |
| T2   |    |       | 0.255 | 0.279 | 0.536 | 0.035 | 0.011 | 0.012 |
| T3   |    |       |       | 0.955 | 0.602 | 0.280 | 0.073 | 0.104 |
| T4   |    |       |       |       | 0.642 | 0.258 | 0.068 | 0.096 |
| T5   |    |       |       |       |       | 0.123 | 0.035 | 0.045 |
| T6   |    |       |       |       |       |       | 0.230 | 0.433 |
| T7   |    |       |       |       |       |       |       | 0.368 |
| T8   |    |       |       |       |       |       |       |       |

| S2c. |    |       |       |       |       |       |       |       |
|------|----|-------|-------|-------|-------|-------|-------|-------|
| D88  | T1 | T2    | T3    | T4    | T5    | T6    | T7    | T8    |
| T1   |    | 0.758 | 0.777 | 0.265 | 0.258 | 0.052 | ***   | ***   |
| T2   |    |       | 0.981 | 0.424 | 0.415 | 0.109 | 0.001 | ***   |
| T3   |    |       |       | 0.410 | 0.401 | 0.103 | 0.001 | ***   |
| T4   |    |       |       |       | 0.988 | 0.437 | 0.013 | 0.010 |
| T5   |    |       |       |       |       | 0.447 | 0.014 | 0.010 |
| T6   |    |       |       |       |       |       | 0.074 | 0.054 |
| T7   |    |       |       |       |       |       |       | 0.783 |
| T8   |    |       |       |       |       |       |       |       |

| S2d. |    |       |       |       |       |       |       |       |
|------|----|-------|-------|-------|-------|-------|-------|-------|
| D129 | T1 | T2    | T3    | T4    | T5    | T6    | T7    | T8    |
| T1   |    | 0.477 | 0.802 | 0.628 | 0.384 | 0.696 | 0.837 | 0.656 |
| T2   |    |       | 0.336 | 0.231 | 0.111 | 0.748 | 0.613 | 0.220 |
| T3   |    |       |       | 0.815 | 0.537 | 0.521 | 0.648 | 0.862 |
| T4   |    |       |       |       | 0.702 | 0.381 | 0.489 | 0.937 |
| T5   |    |       |       |       |       | 0.205 | 0.280 | 0.623 |
| T6   |    |       |       |       |       |       | 0.853 | 0.383 |
| T7   |    |       |       |       |       |       |       | 0.503 |
| T8   |    |       |       |       |       |       |       |       |

| S2e. |    |       |       |       |       |       |       |       |
|------|----|-------|-------|-------|-------|-------|-------|-------|
| D170 | T1 | T2    | T3    | T4    | T5    | T6    | T7    | T8    |
| T1   |    | 0.918 | 0.327 | 0.863 | 0.358 | 0.011 | ***   | 0.002 |
| T2   |    |       | 0.364 | 0.945 | 0.312 | 0.009 | ***   | 0.001 |
| T3   |    |       |       | 0.391 | 0.102 | 0.002 | ***   | ***   |
| T4   |    |       |       |       | 0.285 | 0.008 | ***   | 0.001 |
| T5   |    |       |       |       |       | 0.105 | 0.001 | 0.036 |
| T6   |    |       |       |       |       |       | 0.126 | 0.773 |
| T7   |    |       |       |       |       |       |       | 0.165 |
| T8   |    |       |       |       |       |       |       |       |

| S2f. |   |       |       |       |       |
|------|---|-------|-------|-------|-------|
| T1   | N | D47   | D88   | D129  | D170  |
| N    |   | 0.655 | 0.149 | 0.151 | 0.305 |
| D47  |   |       | 0.044 | 0.044 | 0.535 |
| D88  |   |       |       | 0.978 | 0.007 |
| D129 |   |       |       |       | 0.007 |
| D170 |   |       |       |       |       |

| S2g. |   |       |       |       |       |
|------|---|-------|-------|-------|-------|
| T2   | N | D47   | D88   | D129  | D170  |
| N    |   | 0.654 | 0.217 | 0.037 | 0.285 |
| D47  |   |       | 0.429 | 0.110 | 0.112 |
| D88  |   |       |       | 0.468 | 0.014 |
| D129 |   |       |       |       | ***   |
| D170 |   |       |       |       |       |

| S2h. |   |       |       |       |       |
|------|---|-------|-------|-------|-------|
| T3   | N | D47   | D88   | D129  | D170  |
| N    |   | 0.257 | 0.637 | 0.625 | 0.012 |
| D47  |   |       | 0.089 | 0.081 | 0.134 |
| D88  |   |       |       | 0.993 | 0.001 |
| D129 |   |       |       |       | 0.001 |
| D170 |   |       |       |       |       |

| S2i. |   |       |       |       |       |
|------|---|-------|-------|-------|-------|
| T4   | N | D47   | D88   | D129  | D170  |
| N    |   | 0.942 | 0.306 | 0.122 | 0.456 |
| D47  |   |       | 0.331 | 0.133 | 0.397 |
| D88  |   |       |       | 0.642 | 0.073 |
| D129 |   |       |       |       | 0.016 |
| D170 |   |       |       |       |       |

| S2j. |   |       |       |       |       |
|------|---|-------|-------|-------|-------|
| T5   | N | D47   | D88   | D129  | D170  |
| N    |   | 0.909 | 0.477 | 0.352 | 0.893 |
| D47  |   |       | 0.539 | 0.403 | 0.800 |
| D88  |   |       |       | 0.840 | 0.396 |
| D129 |   |       |       |       | 0.283 |
| D170 |   |       |       |       |       |

| S2k. |   |     |       |       |       |
|------|---|-----|-------|-------|-------|
| T6   | N | D47 | D88   | D129  | D170  |
| N    |   |     |       |       |       |
| D47  |   |     | 0.211 | 0.001 | 0.022 |
| D88  |   |     |       | 0.075 | 0.330 |
| D129 |   |     |       |       | 0.489 |
| D170 |   |     |       |       |       |

| S2l. |   |     |       |      |       |
|------|---|-----|-------|------|-------|
| T7   | N | D47 | D88   | D129 | D170  |
| N    |   |     |       |      |       |
| D47  |   |     | 0.311 | ***  | ***   |
| D88  |   |     |       | ***  | ***   |
| D129 |   |     |       |      | 0.530 |
| D170 |   |     |       |      |       |

| S2m. |   |     |       |       |       |
|------|---|-----|-------|-------|-------|
| T8   | N | D47 | D88   | D129  | D170  |
| N    |   |     |       |       |       |
| D47  |   |     | 0.879 | 0.001 | 0.001 |
| D88  |   |     |       | 0.001 | 0.001 |
| D129 |   |     |       |       | 0.924 |
| D170 |   |     |       |       |       |

**PROPORTION OF TIME IN BOTTOM ZONE**

**Table S3a-m.** Showing p-values of pairwise contrasts for the analysis of time in bottom zone (see Fig. 3c)

S3a.

| N  | T1 | T2    | T3    | T4    | T5    | T6 | T7 | T8 |
|----|----|-------|-------|-------|-------|----|----|----|
| T1 |    | 0.951 | 0.133 | 0.006 | 0.010 |    |    |    |
| T2 |    |       | 0.150 | 0.007 | 0.013 |    |    |    |
| T3 |    |       |       | 0.207 | 0.298 |    |    |    |
| T4 |    |       |       |       | 0.802 |    |    |    |
| T5 |    |       |       |       |       |    |    |    |
| T6 |    |       |       |       |       |    |    |    |
| T7 |    |       |       |       |       |    |    |    |
| T8 |    |       |       |       |       |    |    |    |

S3b.

| D47 | T1 | T2    | T3    | T4    | T5    | T6    | T7    | T8    |
|-----|----|-------|-------|-------|-------|-------|-------|-------|
| T1  |    | 0.518 | 0.204 | 0.027 | 0.030 | 0.016 | 0.016 | 0.016 |
| T2  |    |       | 0.525 | 0.093 | 0.104 | 0.049 | 0.049 | 0.047 |
| T3  |    |       |       | 0.235 | 0.264 | 0.110 | 0.109 | 0.103 |
| T4  |    |       |       |       | 0.920 | 0.389 | 0.385 | 0.342 |
| T5  |    |       |       |       |       | 0.357 | 0.315 |       |
| T6  |    |       |       |       |       |       | 0.990 | 0.883 |
| T7  |    |       |       |       |       |       |       | 0.893 |
| T8  |    |       |       |       |       |       |       |       |

S3c.

| D88 | T1 | T2    | T3    | T4    | T5    | T6    | T7    | T8    |
|-----|----|-------|-------|-------|-------|-------|-------|-------|
| T1  |    | 0.095 | 0.036 | 0.042 | 0.021 | 0.058 | 0.078 | 0.104 |
| T2  |    |       | 0.560 | 0.635 | 0.328 | 0.777 | 0.911 | 0.869 |
| T3  |    |       |       | 0.907 | 0.638 | 0.755 | 0.632 | 0.428 |
| T4  |    |       |       |       | 0.564 | 0.844 | 0.714 | 0.499 |
| T5  |    |       |       |       |       | 0.455 | 0.374 | 0.229 |
| T6  |    |       |       |       |       |       | 0.863 | 0.638 |
| T7  |    |       |       |       |       |       |       | 0.775 |
| T8  |    |       |       |       |       |       |       |       |

S3d.

| D129 | T1 | T2    | T3    | T4    | T5    | T6    | T7    | T8    |
|------|----|-------|-------|-------|-------|-------|-------|-------|
| T1   |    | 0.243 | 0.056 | 0.065 | 0.020 | 0.007 | 0.007 | 0.096 |
| T2   |    |       | 0.437 | 0.478 | 0.203 | 0.075 | 0.067 | 0.657 |
| T3   |    |       |       | 0.943 | 0.576 | 0.210 | 0.182 | 0.685 |
| T4   |    |       |       |       | 0.531 | 0.193 | 0.168 | 0.744 |
| T5   |    |       |       |       |       | 0.401 | 0.339 | 0.321 |
| T6   |    |       |       |       |       |       | 0.862 | 0.101 |
| T7   |    |       |       |       |       |       |       | 0.088 |
| T8   |    |       |       |       |       |       |       |       |

S3e.

| D170 | T1 | T2    | T3    | T4    | T5    | T6    | T7    | T8    |
|------|----|-------|-------|-------|-------|-------|-------|-------|
| T1   |    | 0.177 | 0.032 | 0.434 | 0.495 | 0.244 | 0.014 | 0.014 |
| T2   |    |       | 0.443 | 0.578 | 0.038 | 0.009 | ***   | ***   |
| T3   |    |       |       | 0.187 | 0.003 | ***   | ***   | ***   |
| T4   |    |       |       |       | 0.139 | 0.049 | 0.001 | 0.001 |
| T5   |    |       |       |       |       | 0.626 | 0.049 | 0.052 |
| T6   |    |       |       |       |       |       | 0.095 | 0.104 |
| T7   |    |       |       |       |       |       |       | 0.778 |
| T8   |    |       |       |       |       |       |       |       |

S3f.

| T1   | N | D47   | D88   | D129  | D170  |
|------|---|-------|-------|-------|-------|
| N    |   | 0.517 | 0.547 | 0.675 | 0.556 |
| D47  |   |       | 0.965 | 0.820 | 0.954 |
| D88  |   |       |       | 0.855 | 0.988 |
| D129 |   |       |       |       | 0.866 |
| D170 |   |       |       |       |       |

S3g.

| T2   | N | D47   | D88   | D129  | D170  |
|------|---|-------|-------|-------|-------|
| N    |   | 0.303 | 0.078 | 0.261 | 0.774 |
| D47  |   |       | 0.499 | 0.933 | 0.177 |
| D88  |   |       |       | 0.551 | 0.033 |
| D129 |   |       |       |       | 0.146 |
| D170 |   |       |       |       |       |

S3h.

| T3   | N | D47   | D88   | D129  | D170  |
|------|---|-------|-------|-------|-------|
| N    |   | 0.612 | 0.242 | 0.496 | 0.073 |
| D47  |   |       | 0.495 | 0.863 | 0.013 |
| D88  |   |       |       | 0.603 | 0.001 |
| D129 |   |       |       |       | 0.006 |
| D170 |   |       |       |       |       |

S3i.

| T4   | N | D47   | D88   | D129  | D170  |
|------|---|-------|-------|-------|-------|
| N    |   | 0.631 | 0.806 | 0.813 | 0.075 |
| D47  |   |       | 0.812 | 0.471 | 0.022 |
| D88  |   |       |       | 0.629 | 0.041 |
| D129 |   |       |       |       | 0.123 |
| D170 |   |       |       |       |       |

S3j.

| T5   | N | D47   | D88   | D129  | D170  |
|------|---|-------|-------|-------|-------|
| N    |   | 0.561 | 0.420 | 0.735 | 0.530 |
| D47  |   |       | 0.798 | 0.797 | 0.229 |
| D88  |   |       |       | 0.613 | 0.159 |
| D129 |   |       |       |       | 0.332 |
| D170 |   |       |       |       |       |

S3k.

| T6   | N | D47 | D88   | D129  | D170  |
|------|---|-----|-------|-------|-------|
| N    |   |     |       |       |       |
| D47  |   |     | 0.341 | 0.680 | 0.142 |
| D88  |   |     |       | 0.524 | 0.546 |
| D129 |   |     |       |       | 0.228 |
| D170 |   |     |       |       |       |

S3l.

| T7   | N | D47 | D88   | D129  | D170  |
|------|---|-----|-------|-------|-------|
| N    |   |     |       |       |       |
| D47  |   |     | 0.293 | 0.759 | 0.835 |
| D88  |   |     |       | 0.400 | 0.358 |
| D129 |   |     |       |       | 0.917 |
| D170 |   |     |       |       |       |

S3m.

| T8   | N | D47 | D88   | D129  | D170  |
|------|---|-----|-------|-------|-------|
| N    |   |     |       |       |       |
| D47  |   |     | 0.186 | 0.121 | 0.615 |
| D88  |   |     |       | 0.800 | 0.312 |
| D129 |   |     |       |       | 0.209 |
| D170 |   |     |       |       |       |
